# Supplementary material for: 1α,25(OH)2-3-Epi-Vitamin D3, a Natural Physiological Metabolite of Vitamin D3: Its Synthesis, Biological Activity and Crystal Structure with Its Receptor
Source: PLOS journal article supplement (doi:10.1371/journal.pone.0018124), 2011-03-31

**SCHEME 2: Synthesis of enol triflate 3.**

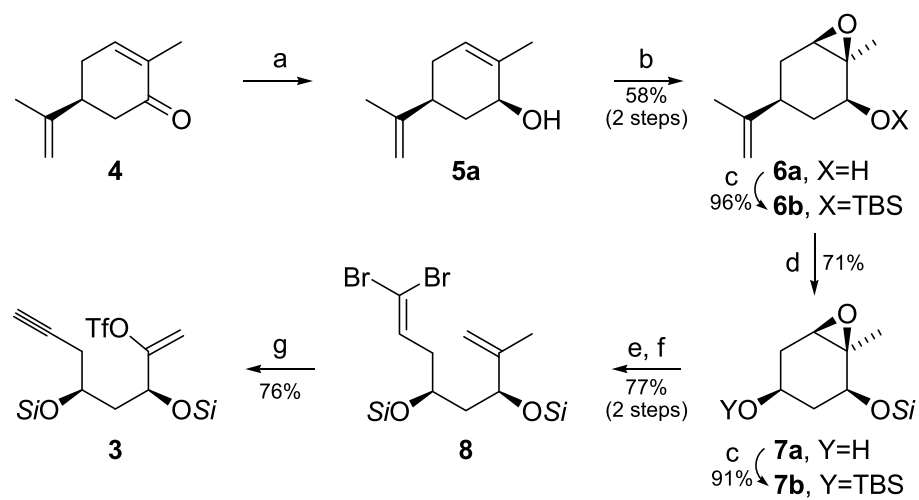

Supplement: S7 (10.1371/journal.pone.0018124.s007) [file journal.pone.0018124.s007]
